# Supplementary material for: How Effectively Do Blogs Translate Pandemic Research into Societal Engagement?
Source: Research Square preprint supplement (doi:10.21203/rs.3.rs-7693222/v1), 2025-11-26
Supplement: Supplementary file 1 [file 365d614009dc940d4a85d670.docx]

**Supplementary materials**

Table S1. Coding scheme for blog analysis (Source: Authors own work)

| **Dimension** | **Sub-elements** | **Operational definition** | **Examples** |
| --- | --- | --- | --- |
| **Blog source** | Type | Organizational affiliation of the hosting domain, derived from “About Us” pages, metadata, or institutional info. | University blog, Media outlet, Independent platform, NGO site |
| Media style | Nature of the publisher’s communication style. | News reporting, Opinion, Institutional updates |
| Credibility | Categorical judgment (High/Medium/Low), based on affiliation, transparency, and AI-assisted classification (ChatGPT, cross-checked manually). | High: University or government site; Medium: NGO; Low: anonymous independent blog |
| Country | Geographic location of the blog host, based on metadata/domain registration. Not treated as proxy for credibility. | USA, UK, Brazil |
| **Blogger** | Openness | Degree of publicly available author identification. | Full (name + profile), Partial (limited info), Anonymous |
| Occupation | Professional role of blogger, classified via standard occupational categories. | Researcher, Journalist, Health professional |
| Affiliation | Institutional link of the blogger. | University, Media organization, NGO, Independent |
| Field of activity | Broad thematic or disciplinary area of author. | Public health, Environmental science, Political science |
| **Blog title** | Intent | Communicative aim of title. | Informative (“New study shows…”), Advocative, Critical, Promotional |
| Bias orientation | Use of emotional or loaded language. Manually flagged; ChatGPT-assisted coding (5 runs, consolidated). ***Limitations:** interpretive; sarcasm/irony may be missed. | Neutral (“Update on COVID-19 research”), Negative (“Flawed science misleads public”), Positive (“Breakthrough discovery”), Controversial (“Debate erupts over study”) |
| **Blog text** | Citation context | Textual environment surrounding a cited scientific article (±20–30 words), coded for tone (supportive/neutral/critical), purpose (evidence, argument, critique), and depth (mention vs. extended discussion). | Example: “As shown in [Smith et al., 2020], mask use significantly reduced…” (evidence, supportive, extended). |
| Citation motivation | Underlying reason for citing the article. | Provide evidence, Support argument, Criticize findings |
| **Blog comments** | Allowed/Disallowed | Whether commenting was technically enabled. | Allowed, Not allowed |
| Commented/Non-commented | If allowed, whether any comments appeared. | Commented (with discussion), Non-commented (no activity) |

Table S2. Examples of Terms in Description of Bloggers’ Occupation (Source: Authors own work)

| *Blogger Occupation Category* | *Examples of Terms from Blogger Descriptions* |
| --- | --- |
| Academic & Researcher | Scientist; Professor; Faculty; Fellow; Lecturer; Policy Advisor; Researcher; Professors; Former Scientist; Assistant Professor; Emeritus Professor; Senior Research Fellow; Principal Economist; Economist; Research Fellow; Academic; Chairholder; Research Associate; Senior Lecturer; Associate Professor; Chair; Professor Emerita; Senior Fellow; Senior Researcher; Professor Emerita; Research Scholar; Reader; Research Scholar Medical Anthropologist; Faculty Fellow; Philosopher; Anthropologist; Biologist; |
| Media & Communication Professions | Writer; Critic; Blogger; Cartoonist; Author; Communicator; Podcaster; Publisher; Journalist; Poet; Spokesperson; Filmmaker; Science Writer; Speaker; Community Manager; Media Specialist |
| Executive Leaders | Consultant; Coordinator; President; Director; Associate; Associate Director; CMO; Lab Director; Advisor; Programme Director; Research Director; Project Manager; Deputy Director; Officer; Corporate Finance Advisor; Senior Advisor; Team Contributor |
| Medical & Health Professions | Psychiatrist; Psychoanalyst; Epidemiologist; Genetic Counselor; Psychologist; Physician; Social Worker |
| Editors | Editor; Editor-in-Chief |
| Educators | Educators |
| Student / Trainee | MSc Student; PhD Researcher; Doctoral Fellow; PhD Student |
| Tech & Engineering Professions | Software Designer; Data Scientist; System Administrator |
| Legal Professions | Legal Adviser; Attorney |
| Library & Information Science Specialist | Librarian |
| Other Professions | Yoga Instructor; Builder; Reiki Practitioner; Registrar |

Table S3. Examples of Terms in Description of Bloggers’ Field of Activity

| *Blogger Field of Activity* | *Examples of Terms from Blogger Descriptions* |
| --- | --- |
| Medical & Health Sciences | Medicine; Emergency Medicine; Immunology; Food Science; Virology; Genetics; Epidemiology; Public Health; Synthetic Biology; Microbiology; Cell Biology; Health Policy; Drug Discovery; Neuroscience; Vaccinology; Oral Medicine; Infectious Disease; Pharmaceutical Science; Psychedelic Science; Neuroimmunology; ME/CFS; Health Sciences; Internal Medicine; Vaccines; Health; Complementary Medicine; Oncology; Obesity Policy; Dermatology; Infectious Diseases; Pediatrics; Pathology; Biomedical Engineering; Nutrition; Cardiology; Global Health Metrics; Family Medicine; Medical Technology; Clinical Medicine; Neurology; Medical Microbiology; Global Health; Biomedical Science; biochemistry; COVID-19; Food Security; Palliative Care; Digital Health; Healthcare; Health Advocacy; Diagnostics; Biotech; Vaccine Policy; Kidney Disease; Forensic Science; Genomics; Biomedical Imaging; biosciences; Population Health; social care; Global Health Policy; Emergency Care |
| Economics & Business | Finance; Economics; Marketing; Global Economy; Human Resources; Business; Health Economics; Commerce; Business & Organizational Behavior; Corporate Governance; Organizational Behaviour; Entrepreneurship; Management; Operations; development economics; Platform Economy; Economic Geography; Organizational Studies |
| Education & Communication | Science Communication; Research Communication; Music Education; Popular Science; Health Communication; Science & Culture; Education; Science and Culture Communication; Educational Research; Educational Studies; Science Comm; SciComm; STEM Outreach |
| Political & International Studies | Politics; Political Economy; political science; Public Policy; International & Global Studies; Public Administration; Politics and International Relations; International Relations; Conflict Management; Diplomacy; International Studies; International Affairs; Global Studies; Geopolitics; Governance; Democracy; European Politics |
| Law & Policy | Legal Tech; Law; Human Rights; Law (IP; Health Law; Global Health Law; Medical Law and Ethics; Welfare Policy; Criminology; Policy; Disaster Management; Public Law |
| Social Sciences | Anthropology; Sociology; Applied Sociology; Sexuality; Social Research; Social Work; Men's Issues; Inequalities; Labor studies; Rural Sociology; Social Justice; Inequality; Demography; Disability Studies; Cultural Studies |
| Area & Global Studies | Forced Migration; Development Policy; Agrarian Studies; Human Geography; Development Studies; Migration; Geography and Environmental Studies; Development; Planning; Development and Conflict Studies; Peace and Development Studies; Geography; Global Development; Historical Geography; Landscape Architecture; Urban Poverty |
| Psychology & Neuroscience | Mental Health; Behavioral Science; Psychology; Cognitive Science; Neuropsychology; Psychological Science; Stroke; Psychiatry; Brain Health |
| Media & Culture | University Communications; Cultural Commentary; Conflict Journalism; Journalism; Communications; Library Science; Media Relations; International Reporting; Science Journalism; Public Media; News; Public Relations; Public Radio; Information Science; Medical Journalism; Library Sci; Communication; Media |
| Technology & Engineering | Machine Learning; Bioinformatics; Clinical Data Science; Technology; Artificial Intelligence; Cybersecurity; Statistics; Data Science; Emerging Tech; Emerging Technology; Engineering & Technology; Engineering; AI; Tech; Tech Policy; Construction; Nuclear Engineering |
| Environment & Sustainability | Environment; Climate Science; Climate Communication; Climate Science Denialism; Climate Skepticism; Climate Policy; Ecology; Sustainability; Environmental Justice; Climate Science Communication; Ecology and Evolution; Natural Resources; Environmental Science; Environmental Policy |
| STS & Interdisciplinary | General Commentary; Science & Technology; Science; Open Science; Science Studies; Science and Technology; Research Administration; Science Publishing |
| Humanities | Music Industry; Culture; Music History; Religious Studies; Design; Music; Arts; Photography; Literature; History |
| Philosophy & Ethics | Philosophy; Bioethics; Ethics |
| Biological & Agricultural Sciences | Animal Health; Evolutionary Biology; Veterinary Pathology; Biological Sciences; Agriculture; Veterinary Medicine |
| Physical Sciences | Space; Chemistry |
| Unclassified and Unknown | Defense Studies; Defense; Gender; Gender Studies; Unknown |

Table S4. Examples of blog post titles that are classified based on various intent and bias orientation. Note some blogs could fit in several categories. (Source: Authors own work)

| *Characteristics of Blog Post Title* | *Examples* |
| --- | --- |
|  |
| Intent: |  |
| Educational | “Can misinformation really impact people’s intent to get vaccinated?” <http://systems-signals.blogspot.com/2023/01/can-misinformation-really-impact.html>  “Doubts about that article claiming that hydroxychloroquine/chloroquine is killing people” <https://statmodeling.stat.columbia.edu/2020/05/24/doubts-about-that-article-claiming-that-hydroxychloroquine-chloroquine-is-killing-people/> |
| News and Reporting | “Local public health professionals report five lessons learned during the covid pandemic: the results of guided reflection” <https://jphmpdirect.com/local-public-health-professionals-report-five-lessons-learned-during-the-covid-pandemic-the-results-of-guided-reflection/> |
| Critical and Opinion-based | “To wear or not to wear: WHO’s confusing guidance on masks in the covid-19 pandemic” <https://blogs.bmj.com/bmj/2020/03/11/whos-confusing-guidance-masks-covid-19-epidemic/> |
| Investigative and Watchdog | “Weekend reads: questions about Russian COVID-19 vaccine data; a p-value pledge; why one author removed her name from a paper” <https://retractionwatch.com/2020/09/12/weekend-reads-questions-about-russian-covid-19-vaccine-data-a-p-value-pledge-why-one-author-removed-her-name-from-a-paper/> “How The Pandemic Has Exacerbated The Gender Divide In Household Labor” <https://www.buzzfeednews.com/article/elaminabdelmahmoud/parenting-dads-gender-gap> |
| Policy Analysis | “COVID-19 and Uncertainties in the Value Per Statistical Life” <https://www.theregreview.org/2020/08/05/robinson-covid-19-uncertainties-value-statistical-life/> |
| Advocacy and Activism | “Un-Fake News: Deaths Up by 20 Percent” <https://conscienhealth.org/2020/10/un-fake-news-deaths-up-by-20-percent/> |
| Academic Discussion | “Atypical Signs, Symptoms and Testing Methods of COVID-19” <https://www.kolabtree.com/blog/atypical-signs-symptoms-and-testing-methods-of-covid-19/> |
| Misinformation Analysis | “There is no COVID-19 “Casedemic.” The pandemic is real and deadly.” <https://sciencebasedmedicine.org/no-covid-19-casedemic/> |
| Evidence-based Medicine | Emergency Evidence Updates – January 2023 <https://www.thebottomline.org.uk/blog/emergency-evidence-updates-january-2023/> |
| Bias Orientation: |  |
| Objective & Neutral | “Why telehealth is a complicated option for domestic violence survivors” <https://rewire.news/article/2020/05/08/telehealth-domestic-violence/>  “The art and science of boarding an airplane in a pandemic” <https://arstechnica.com/?p=1736971> |
| Advocacy & Activist Framing | “Digital tools remain key for women’s activism in Africa despite challenges” <https://blogs.lse.ac.uk/africaatlse/2022/11/16/digital-tools-remain-key-for-womens-activism-in-africa-despite-challenges/>  “Secure land rights are now more important than ever” <https://www.iied.org/secure-land-rights-are-now-more-important-ever> |
| Sensationalist | “Since Google Suppressed My Post on the CDC, School Reopening, and Aerosols, I’m Re-Posting It” <https://www.nakedcapitalism.com/2021/03/since-google-suppressed-my-post-on-the-cdc-school-reopening-and-aerosols-im-re-posting-it.html> |
| Political Bias | “Austerity Raises Covid Deaths” <https://www.nakedcapitalism.com/2021/03/austerity-raises-covid-deaths.html> |
| Misinformation-Prone | “Coronavirus: No10 accused of “institutional racism” for november lockdown sacrificing Diwali” <https://whatsnew2day.com/coronavirus-no10-accused-of-institutional-racism-for-november-lockdown-sacrificing-diwali/> |

Table S5. Topic themes in Blogs mentioning scientific publications across SS&H and STEM fields. (Source: Authors own work)

| **Themes** | **STEM** | **SS&H** |
| --- | --- | --- |
| COVID-19 Specific | self-made masks, harms of masks, spreading of coronavirus at workplaces, in different events and different countries, traveling guidelines for vaccinated people, willingness to take vaccine, anti-vacciners’ claims, contact tracing challenges, special pandemic issue announcements | social representations during pandemic, vaccine hesitancy, vaccination schedules, mask policies, pandemic era, pandemic policies (in different countries), pandemic restrictions, effects of lockdowns, airplane boarding during pandemic, response to Covid-19 in different countries, communication about coronavirus, comparison of pandemic and plague, covid conspiracy theories, covid language, covid-19 scams, trust and vaccine intention, cultural differences in crisis management, pandemic healthcare in different countries, effect of pandemic in different careers, crisis leadership, vaccine distribution, vaccine boosters, covid statistics |
| Health & Medical Research | vaccine risks, covid deaths, vaccine trials, omicron variant, effect of covid on kidneys, covid in flu season, smell test for covid, stroke care, clinical trials on dietary supplements, covid infection, vaccine (complications, doses, effectiveness, for older people, in MS patients, trial results), coronavirus detection from air, in tissues after death, transmission on domestic animals, covid and gut microbiome, covid immunity | antibacterial resistance, countries healthcare system, online health care services, global health, evidence-based policy, transmission of coronavirus, parasites and covid, effects of covid vaccination, impacts of omicron variant, palliative care in covid context, covid vaccine safety |
| General Interest & Media | most read articles, advertisements about music and musicians, latest coronavirus news, | comics, cheating in media, covid discourses in newspapers, (recorder, musical instruments etc.) advertisements, rumours during the pandemic |
| Environment | climate change, pollution and covid, covid in bats, secondary organic aerosols, ocean acidification effects in sharks, wastewater research, emergence of life on earth, | natural resources, GMO products, food waste, benefits of gardening, agrobiodiversity, exoplanets, energy system transformation, clean tech, contract farming |
| Academic & Scholarly | retracted articles, review of covid trials, vaccine research, research ethics, ethical evaluation of vaccine development, latest articles on covid, genome sequencing, organoids, genes, microbiome | trust in scientists, impact of the pandemic on higher education, science communications, open science, academic Twitter communities, retracted papers, journal article abstracts, journal introduction, journal special issues, current articles, latest publications, candidates for journal article prize |
| Social & Cultural Studies | race and ethnicity | Medieval France, urban planning, medical anthropology, social stigma, social support discussion, authoritarian views |

| **Themes** | **STEM** | **SS&H** |
| --- | --- | --- |
| Technology & Innovation | telehealth, medical innovations, detecting coronavirus from wastewater, biofoundries in covid testing, neutron scattering, photometrics, image segmentation, digital contact tracing | machine learning in decision making, open source projects, genetic information in crime investigation, social media use, virtual reality porn, augmented reality in teaching, chatbots in customer service, customers views on algorithms |
| Social Issues & Advocacy | vaccine criticism, vaccine hesitancy among minorities, prisons during pandemic | law, health law, health inequalities, consumer views of scientific claims, social inclusion during the pandemic, questioning official stories, gender roles during remote work, immigration policies, racial diversity of doctors, small communities, trust in institutions, abuse victims, neoliberalism, design of public services, female leadership, healthcare professionals’ antiracism training, ableism in higher education, vaccine policy critics, pandemic disinformation |
| Children & Family | vaccine benefits for children and adolescents, vaccine trials for children, children and young people in intensive care, children's immunity to covid, coronavirus and pregnancy | effects of pandemic on youth, mothers' mental load, parents' wellbeing, adolescents' prosociality, child abuse, working mothers, vaccine trials for children, improving school-family communication, children during lockdowns, childrens living arrangements |
| Education | school reopening, covid policy for children | tourism students, students cognitive skills, school interventions during pandemic, student support, teaching intervention, mask use at school, pandemic and student life, education in different countries, effects of pandemic in school children, students' learning challenges, helping students to graduate, covid effects on education, criticisms on digital schooling, teacher wellbeing, teachers' anxiety, remote education, augmented reality in teaching, teacher education during pandemic |
| Psychology | long covid, opioid deaths, autoimmune reaction, coping with stress | social influence, illusory perception, perceptions of contagion, perceptions of time during pandemic, paranoia, zombies, mental health, long covid effects on brain, mental health-related crimes during pandemic, sociopathy and covid regulations, prosocial behavior during pandemic, moral distress of healthcare workers, pandemic behaviour, care work at home, learning inequalities, media psychology, questioning rapid-onset gender dysphoria (ROGD), domestic violence and victim help, animated pornography, life course research, stress and obesity during pandemic, dreams during the pandemic, crisis as mass hysteria, nostalgia, reasons for getting bored, relationships, effect of memes in mental wellbeing, interpersonal trust |
| Business & Economic Impacts | effect of vaccine certificate to vaccine uptake, covid policies | small and medium businesses, supply chains, tax policies, vaccination patents, value per statistical life, pay rises, car industry, crisis of global economy, food supply chains, decision making, food insecurity, public economy of covid, covid and economics, economics of vaccination, effects of covid on labour market, covid relief funding, corona recovery fund, corporate managers during pandemic |
| Lifestyle & Personal Wellbeing | mouth washes, dental care during pandemic, consumers’ food choices | art therapy, gig workers, commuting to work, consumption of shared products, food consumption, emergency food programme, farmer markets during pandemic, dairy use, home organizing, health care needs of older adults, traveling with cruise ships, luxury brand consumption, monetization on gaming streams, Electronic Press Kit |
